# Supplementary material for: Changes in the Transcriptome of the Human Endometrial Ishikawa Cancer Cell Line Induced by Estrogen, Progesterone, Tamoxifen, and Mifepristone (RU486) as Detected by RNA-Sequencing
Source: PLoS One. 2013 Jul 16;8(7):e68907. doi: 10.1371/journal.pone.0068907 (PMC3712916; doi:10.1371/journal.pone.0068907)
Supplement: Table S5 — (XLSX) [file pone.0068907.s009.xlsx]

## Sheet: Sheet1
Table S5. Gene expressions (lndiff) significantly changed after TAM treatment in Ishikawa cells.
locus	gene_short_first	Ish_Tam.12h	Ish_E2.3h	Ish_E2.12h
chr1:955456-991501	AGRN	-0.261627	-0.246728	0.102564
chr1:1384338-1470067	ATAD3A	0.33079	0.283251	0.354874
chr1:6484798-6580069	ESPN	0.840468	0.730289	0.5162
chr1:8921057-8939151	ENO1	14	14	14
chr1:9302958-9331394	H6PD	-0.66083	0.348716	0.394456
chr1:20959947-20988063	PINK1	-0.694716	-0.337958	0.147378
chr1:22148736-22260268	HSPG2	-14	-0.18363	-0.0498957
chr1:26126666-26145278	SEPN1	-0.2441	-0.0180609	0.170424
chr1:28832454-28865966	RCC1	0.24877	-0.105193	-0.234497
chr1:36621802-36646444	MAP7D1	0.399797	-0.251511	0.271401
chr1:38259773-38325292	C1orf122	0.65166	0.445864	0.574325
chr1:41445006-41478302	CTPS	0.338292	0.185419	-0.0620936
chr1:43996546-44089343	PTPRF	-0.352483	-0.144831	0.0123787
chr1:44435652-44439043	DPH2	0.361268	0.0849034	0.162733
chr1:45205426-45233487	KIF2C	-0.300787	-0.389301	-0.329946
chr1:45805341-45956840	TOE1	0.474418	0.116293	0.231852
chr1:47469874-47516426	CYP4X1	-1.14038	-0.161441	-0.0335864
chr1:52082545-52344609	OSBPL9	-0.252005	-0.0682824	-0.0999496
chr1:76251885-76260942	RABGGTB	0.309387	0.0779049	-0.139429
chr1:107682628-108024812	NTNG1	-0.444702	0.237535	0.401791
chr1:110162458-110174677	AMPD2	0.528766	0.154222	0.478698
chr1:111889179-111895668	C1orf88	-0.711638	0.650229	0.53881
chr1:113615816-113670010	LRIG2	-0.386746	-0.183226	-0.506055
chr1:116908666-116961244	ATP1A1	-0.532256	-0.415769	-0.256158
chr1:120254403-120272137	PHGDH	-0.375802	-0.210177	-0.0230472
chr1:145209098-145368684	NBPF10	-0.333909	-0.204325	-0.0295309
chr1:149813599-149859466	HIST2H2AC	-0.549745	-0.323602	-0.160685
chr1:151227196-151240008	PSMD4	0.431583	0.239723	0.473867
chr1:153533584-153539202	S100A2	2.10587	-0.208695	-0.865232
chr1:153591167-153621234	CHTOP	0.500687	-0.0523883	-0.0381145
chr1:153591167-153621234	S100A13	0.644534	0.214127	0.0352819
chr1:156076478-156109878	LMNA	0.300831	-0.16045	0.13737
chr1:156123321-156147762	SEMA4A	-0.59355	0.0856058	0.183907
chr1:164528322-164821067	PBX1	-0.478275	-0.320269	-0.179507
chr1:171639613-171773989	METTL13	0.398098	0.119714	0.0573509
chr1:178694299-178891004	RALGPS2	-0.202577	-0.0850843	-0.111905
chr1:179051111-179065132	TOR3A	0.312467	0.139151	-0.0312784
chr1:179923907-180084015	CEP350	-0.34325	-0.510125	-0.653928
chr1:180933896-181031074	MR1	-0.658096	0.176994	0.050906
chr1:182992402-183114814	LAMC1	-0.247694	-0.408828	-0.26432
chr1:201354825-201356300	LAD1	0.632511	0.211591	0.0118775
chr1:203096835-203136533	ADORA1	1.06362	0.597653	0.777185
chr1:206516004-206637783	SRGAP2	-0.311674	-0.172745	0.0320282
chr1:211432666-211489820	RCOR3	-0.326616	-0.047364	-0.030868
chr1:212780433-212794116	ATF3	1.99513	0.632805	0.587242
chr1:214776531-214839481	CENPF	-0.471955	-0.699687	-0.719506
chr1:217804682-218041201	SPATA17	-1.00854	0.328535	0.572323
chr1:223889294-223963720	CAPN2	0.590041	0.0420049	0.420611
chr1:223967594-224033674	TP53BP2	-2.67163	-1.26099	-0.633396
chr1:225965514-225978280	SRP9	-0.227034	0.100421	-0.162333
chr1:228644565-228649066	HIST3H2BB	-0.782664	-0.0870818	-0.196305
chr1:229761970-229796791	URB2	0.35569	0.342174	-0.243985
chr1:236305825-236373685	GPR137B	-0.795555	-0.0638631	0.159588
chr1:236557558-236650405	EDARADD	0.35938	-0.0598718	-0.167912
chr1:879080-894679	NOC2L	0.343909	-0.0725148	0.104335
chr1:1227763-1243269	ACAP3	0.514519	0.89298	1.18343
chr1:1570549-1677559	SLC35E2	-0.316596	0.0798928	0.385836
chr1:8412463-8877699	RERE	-0.314735	-0.291689	-0.127173
chr1:8921057-8939151	ENO1	0.35664	-0.132527	-0.106182
chr1:10270763-10480570	KIF1B	1.9186	1.45477	2.19252
chr1:10516488-10532674	DFFA	0.291406	0.174996	0.0717314
chr1:11114642-11118789	SRM	0.492984	-0.0137035	-0.132108
chr1:16450831-16482582	EPHA2	0.770621	-0.356392	-0.000474187
chr1:16888854-16959828	CROCCP2	0.233002	0.340829	0.287119
chr1:17300963-17307173	MFAP2	-0.524181	0.0692462	0.233437
chr1:21068564-21113809	HP1BP3	-0.273916	0.00191259	-0.0868684
chr1:21922707-21995856	RAP1GAP	0.5076	-0.441722	-0.0278854
chr1:22148736-22260268	HSPG2	-0.870943	-0.71713	-0.281939
chr1:23884399-23886322	ID3	1.28319	1.24292	1.22532
chr1:26203005-26232993	STMN1	-0.216998	-0.0966153	-0.0763346
chr1:28473676-28520447	PTAFR	0.80552	-0.0713938	-0.442379
chr1:28879528-28908371	SNHG12	0.819283	0.66848	0.787809
chr1:31732414-31734567	SNRNP40	2.84537	-0.770324	2.13465
chr1:40766027-40780944	COL9A2	-0.469847	-0.119284	0.0566496
chr1:41445006-41478302	CTPS	2.44585	1.137	2.16255
chr1:43391045-43425155	SLC2A1	0.609661	0.0116509	-0.0458647
chr1:43829071-43833699	ELOVL1	0.287622	-0.0771986	-0.137857
chr1:44457279-44497198	SLC6A9	-0.60605	-0.448497	-0.0727834
chr1:46654352-46686255	POMGNT1	-0.329396	0.11629	0.322058
chr1:67278525-67390574	WDR78	-0.892824	0.461656	0.455314
chr1:68167148-68297550	GNG12	-0.260831	-0.0933408	-0.197718
chr1:78409719-78444805	FUBP1	0.220472	-0.272251	-0.220985
chr1:86115105-86174116	ZNHIT6	0.670265	0.116428	0.267474
chr1:92145899-92351836	TGFBR3	0.707601	0.490972	0.118889
chr1:94616031-94703307	ARHGAP29	0.393505	-0.426662	-0.119851
chr1:109822175-109825790	PSRC1	-0.526898	-0.346505	-0.214637
chr1:109852187-109940563	SORT1	-0.197556	-0.204717	-0.245884
chr1:151955307-151965985	S100A10	0.646794	-0.173422	0.0250612
chr1:153507045-153508284	S100A6	0.926783	-0.0687085	-0.252688
chr1:153516088-153517844	S100A4	1.02734	0.0570504	-0.00250569
chr1:153533584-153539202	S100A2	2.08051	0.104003	-0.189242
chr1:153577415-153585626	S100A16	0.610481	0.0525632	0.250621
chr1:153586730-153588793	S100A14	1.27046	-0.47686	-0.54774
chr1:156041761-156052064	MEX3A	-0.390725	0.000948335	0.175904
chr1:156495194-156542396	IQGAP3	-0.32741	-0.332642	-0.305807
chr1:156561553-156571358	GPATCH4	0.547211	0.222332	-0.104941
chr1:156904631-157015628	ARHGEF11	0.364815	-0.0268728	0.0199958
chr1:159887894-159895325	TAGLN2	0.667111	-0.102933	-0.1284
chr1:169890404-170043879	KIFAP3	-0.298735	0.031195	0.0122326
chr1:197053100-197115824	ASPM	-0.368703	-0.557171	-0.700604
chr1:200520624-200589862	KIF14	-0.367329	-0.444554	-0.51189
chr1:201349965-201352894	LAD1	0.816525	-0.0157838	0.270351
chr1:201433423-201438336	PHLDA3	0.554834	-0.053522	0.06128
chr1:202696455-202777616	KDM5B	-0.361031	-0.315187	0.00434358
chr1:209788212-209824679	LAMB3	1.25619	-0.30132	-0.293515
chr1:211649863-211656633	RD3	-0.647913	0.0121378	-0.371118
chr1:211836113-211849004	NEK2	-0.254155	-0.173292	-0.3923
chr1:223394160-223462526	SUSD4	0.600828	0.435197	0.580173
chr1:232533711-232709962	SIPA1L2	0.754699	1.4143	0.22157
chr1:235294497-235324584	RBM34	0.295001	-0.0171274	-0.204148
chr1:244571665-244615436	ADSS	-0.629171	-0.366847	-0.187199
chr1:247460527-247495148	ZNF496	0.36317	0.266087	0.523039
chr10:855309-977435	LARP4B	14	14	14
chr10:23216953-23326514	ARMC3	-1.03304	0.469279	0.199988
chr10:27398723-27476799	MASTL	-0.313325	-0.243718	-0.584061
chr10:43084554-43134038	ZNF33B	14	14	14
chr10:43278366-43330385	BMS1	0.33532	-0.14785	-0.207881
chr10:49514741-49647398	MAPK8	-0.314864	0.0515358	-0.193514
chr10:64926979-65229332	JMJD1C	-0.732808	-0.921894	-0.375878
chr10:70042353-70102953	HNRNPH3	0.292305	0.033618	0.18524
chr10:71029755-71161641	HK1	0.228585	0.0494722	0.209157
chr10:71962148-71993233	PPA1	0.597586	0.109913	-0.0748945
chr10:72575663-72640933	SGPL1	-0.285732	-0.0310728	-0.133519
chr10:80828791-81076285	ZMIZ1	0.862118	-0.205604	0.0895224
chr10:81106851-81115093	PPIF	0.345783	-0.229383	-0.517446
chr10:81838794-81852558	C10orf57	-0.375011	0.096162	0.0557096
chr10:94352824-94415595	KIF11	-0.382375	-0.498473	-0.589156
chr10:101419179-101515970	CUTC	0.882677	0.731026	0.469349
chr10:103881973-103923629	NOLC1	0.234143	0.110141	-0.00307567
chr10:3179881-3215033	PITRM1	0.357754	-0.189441	0.0436543
chr10:43084554-43134038	ZNF33B	-0.321949	-0.167589	-0.0883618
chr10:61786055-62557541	ANK3	-0.311332	-0.320579	-0.283067
chr10:63952905-64028503	RTKN2	-0.559799	-0.209023	-0.269665
chr10:71962148-71993233	PPA1	0.446087	0.00525931	-0.190664
chr10:73366999-73611082	PSAP	-0.209556	0.120978	0.153951
chr10:75257210-75385730	USP54	-0.243085	-0.0983582	0.153348
chr10:81914510-81965328	ANXA11	0.258496	0.1384	0.155466
chr10:94211391-94333872	IDE	0.207818	-0.149837	-0.253439
chr10:103544199-103578229	MGEA5	-0.216206	-0.318591	-0.189733
chr10:116054582-116164515	AFAP1L2	0.59788	-0.177525	-0.153915
chr10:120440493-120514758	C10orf46	-0.22725	-0.413169	-0.285382
chr10:123237843-123357972	FGFR2	-0.558341	-0.134913	-0.0749527
chr10:129894874-129924727	MKI67	-0.475209	-0.889519	-0.781215
chr11:369754-382117	B4GALNT4	-0.62807	0.296632	0.586491
chr11:2421916-2425108	TSSC4	0.591475	0.349374	0.644414
chr11:3876907-3877179	STIM1	14	14	14
chr11:10879763-10900823	LOC729013	-0.879122	-0.0110652	-0.280793
chr11:12132137-12297548	MICAL2	0.488193	0.363226	0.0537356
chr11:18417812-18429765	LDHA	0.527626	0.064029	-0.0632024
chr11:19372270-20143147	NAV2	-0.289514	-0.986543	-0.697893
chr11:34642587-34684834	EHF	-0.207703	0.122965	0.00954134
chr11:35160416-35253949	CD44	1.80054	-0.115976	0.000878373
chr11:36317724-36486754	PRR5L	1.07684	1.02097	0.239472
chr11:43902356-43941925	ALKBH3	0.452772	0.144255	0.0709179
chr11:61891444-61922917	INCENP	-0.418474	-0.427003	-0.508352
chr11:62619309-62623360	SNHG1	1.07049	0.895504	1.30372
chr11:63953586-63972020	STIP1	0.293091	-0.138749	-0.0275365
chr11:65154040-65181112	FRMD8	0.347966	0.217392	0.281734
chr11:65265232-65273981	MALAT1	0.231687	0.472713	1.32095
chr11:67070918-67080078	SSH3	0.352822	0.133928	0.652995
chr11:67273960-67276154	CDK2AP2	14	14	14
chr11:67351065-67354128	GSTP1	-0.403558	0.00127224	0.027647
chr11:68080107-68216743	LRP5	-0.3352	-0.252259	0.164844
chr11:69457073-69469481	CCND1	0.395987	0.163515	0.263864
chr11:69924156-70035652	ANO1	0.432115	0.875994	0.261955
chr11:72929343-72954385	P2RY2	0.747032	0.994267	0.499839
chr11:73359734-73373864	PLEKHB1	-0.471665	0.257146	0.540741
chr11:94898704-94964276	SESN3	-0.479116	-0.285984	-0.227995
chr11:102980159-103298976	DYNC2H1	-0.501831	-0.215826	-0.286957
chr11:117070009-117102811	TAGLN	0.624725	-0.619707	0.106342
chr11:118307204-118397580	MLL	-0.354015	-0.483502	-0.485236
chr11:129685716-129765490	TMEM45B	-0.449998	0.0324443	0.0937245
chr11:6633996-6640692	TPP1	-0.279244	-0.301438	-0.170565
chr11:8633583-8696431	TRIM66	-0.631559	0.168116	0.319166
chr11:9779839-10315754	SBF2	-0.317247	-0.288676	-0.352393
chr11:15987994-16629414	SOX6	-0.240777	-0.0751853	-0.180458
chr11:31531286-31839509	PAX6	-0.449637	-0.0849367	-0.0142098
chr11:32409321-32452363	WT1	0.81256	0.451238	-0.452054
chr11:60617678-60623444	GPR44	0.681617	0.543039	-0.137219
chr11:62201015-62314332	AHNAK	0.281761	-0.217958	-0.119969
chr11:62392297-62414104	GANAB	-0.206314	-0.224199	-0.198258
chr11:62619309-62623360	SNHG1	0.480245	0.182339	0.104192
chr11:64620162-64644433	EHD1	0.447394	0.408401	0.182418
chr11:65292547-65325881	LTBP3	-0.322877	-0.00957023	0.278859
chr11:65627845-65649873	EFEMP2	-0.766947	0.675405	1.18699
chr11:66330912-66336047	CTSF	-0.487097	0.561009	0.831149
chr11:69457073-69469481	CCND1	0.527235	0.235905	0.264004
chr11:73685111-73720282	UCP2	-0.300463	-0.222105	-0.204061
chr11:74165885-74178715	KCNE3	0.569176	-0.811393	-0.618879
chr11:74971165-75062875	ARRB1	0.475538	0.56749	0.575545
chr11:89933375-89956532	CHORDC1	0.561261	-0.0146028	0.141472
chr11:93394806-93500340	SNORA25	0.415647	0.379058	0.217128
chr11:95709682-96076425	MAML2	-0.415265	-0.323565	-0.278782
chr11:100900269-101000550	PGR	1.83929	3.36078	0.954122
chr11:102921412-102962944	DCUN1D5	0.362568	0.399595	-0.0108768
chr11:117070009-117102811	TAGLN	0.827379	-0.659344	0.0500344
chr11:117707690-117748201	FXYD6-FXYD2	-0.612299	0.185943	0.459898
chr11:118868851-118901616	SLC37A4	-0.371563	0.322528	0.304639
chr11:124492741-124543777	SIAE	-0.466182	-0.00821684	-0.0209369
chr11:128328655-128457453	ETS1	0.691887	-0.0890925	0.0535999
chr11:128761239-128791116	C11orf45	0.435724	0.246168	0.164956
chr12:383000-551861	CCDC77	-0.363356	-0.145326	-0.176272
chr12:3066823-3155180	TEAD4	0.445507	0.171793	0.263369
chr12:6600980-6641147	NCAPD2	-0.308577	-0.514914	-0.400324
chr12:13043955-13070872	GPRC5A	1.07995	-0.028466	0.573997
chr12:13349601-13372854	EMP1	0.544868	-0.570426	-0.713687
chr12:14518610-14655940	ATF7IP	-0.336438	-0.1432	-0.144676
chr12:32112349-32146192	C12orf35	0.333594	0.853694	0.0877661
chr12:41086239-41466211	CNTN1	-0.398591	-0.16766	0.170934
chr12:48357329-48365325	TMEM106C	-0.306885	0.170468	-0.214423
chr12:51317832-51326300	METTL7A	-0.395451	-0.113935	-0.202365
chr12:52631471-52715182	KRT7	0.546736	0.0492119	-0.0578003
chr12:56137063-56211561	GDF11	0.617567	0.155271	0.641262
chr12:56391042-56399360	SUOX	0.332909	-0.0288086	0.106802
chr12:56473538-56497338	ERBB3	-0.208509	-0.0858434	-0.0386334
chr12:56498102-56507997	PA2G4	0.222538	0.0204245	-0.00296783
chr12:56862300-56882181	SPRYD4	-1.39196	-0.30942	-0.452314
chr12:58087737-58115917	OS9	-0.165051	-0.0408231	0.0350054
chr12:58212610-58240747	CTDSP2	0.46173	-0.0172991	0.250373
chr12:66736523-67072925	GRIP1	-0.997314	-1.70974	-1.19301
chr12:71833590-71980074	LGR5	-0.880197	0.613077	0.80823
chr12:75879795-75905418	GLIPR1	0.72929	-0.123574	-0.868479
chr12:106696580-106743101	TCP11L2	-0.55523	0.167427	0.377563
chr12:111843751-111889508	SH2B3	0.523487	-0.0620915	0.0125002
chr12:112123856-112194911	ACAD10	-0.577428	0.18766	0.0249468
chr12:113587554-113623299	CCDC42B	-1.58796	0.577136	1.12746
chr12:122064454-122081023	ORAI1	-2.25669	-0.562836	-1.1571
chr12:124086656-124105516	DDX55	0.302948	0.229125	0.363979
chr12:124456379-124500016	ZNF664	-0.205857	0.026078	-0.0192005
chr12:133615460-133639887	ZNF84	-0.324362	0.286518	0.303594
chr12:133657022-133685540	ZNF140	-0.345867	0.202938	-0.0466967
chr12:133719081-133736049	ZNF10	-0.415128	0.460742	0.261725
chr12:2921753-2986321	FOXM1	-0.212044	-0.386451	-0.309069
chr12:4758200-4796750	NDUFA9	14	14	14
chr12:6666036-6677522	NOP2	0.501135	0.186624	-0.108513
chr12:6759572-6772308	ING4	-0.539301	0.318838	0.251397
chr12:13349601-13372854	EMP1	0.453531	-0.875522	-0.709607
chr12:22601514-22697452	KIAA0528	-0.171821	0.134081	0.12529
chr12:25261222-25348094	CASC1	-1.53211	0.353182	0.215821
chr12:27058020-27091254	C12orf11	0.397263	0.198938	-0.145637
chr12:29653745-29937692	TMTC1	-0.224503	-0.168912	0.17747
chr12:31226778-31257859	DDX11	1.67803	-14	1.33122
chr12:31433131-31479122	FAM60A	-0.408197	0.0712857	-0.22348
chr12:39687029-39837192	KIF21A	0.26882	-0.137133	-0.0811294
chr12:46576840-46663208	SLC38A1	-0.395757	-0.139556	-0.252039
chr12:48128452-48139244	RAPGEF3	0.872174	-0.094455	0.714992
chr12:48366745-48398292	COL2A1	-0.39595	0.0302074	0.123586
chr12:49226359-49245957	DDX23	0.317932	-0.154077	-0.0115171
chr12:49469475-49668375	TUBA1A	-0.156819	-0.170047	-0.207647
chr12:50382766-50419307	RACGAP1	-0.209762	-0.242979	-0.323806
chr12:51373301-51422058	SLC11A2	-0.303436	-0.103638	-0.0505206
chr12:52562776-52585793	KRT80	1.09118	-0.103473	0.418556
chr12:56347888-56360496	PMEL	-0.881507	0.287549	0.182345
chr12:57449383-57472574	TMEM194A	-0.376257	-0.277592	-0.325648
chr12:57637241-57824624	R3HDM2	-0.352148	0.219617	0.380557
chr12:58163194-58176352	METTL1	0.696285	0.661861	0.388072
chr12:58212610-58240747	CTDSP2	-0.304437	-0.183563	0.377325
chr12:59265936-59311884	LRIG3	-0.646831	-0.127469	0.360502
chr12:65107058-65153226	GNS	-0.210843	-0.108634	-0.267822
chr12:94700375-94853764	CCDC41	0.477253	0.398448	0.539719
chr12:102406536-102455899	CCDC53	-0.492214	-0.151353	0.0902162
chr12:105413561-105478341	ALDH1L2	-0.706528	-0.334295	-0.38927
chr12:105567074-105630008	APPL2	-0.240452	0.0943633	-0.0514342
chr12:113587554-113623299	DDX54	0.305139	-0.136338	0.179278
chr12:114254462-114404176	RBM19	0.503274	-0.133661	0.206676
chr12:120123524-120315095	CIT	-0.493927	-0.553038	-0.453218
chr12:122064454-122081023	ORAI1	0.679636	0.438147	0.380661
chr12:123405497-123451056	ABCB9	0.987854	0.613381	1.0174
chr12:124808956-125052010	NCOR2	0.214365	-0.30695	-0.233045
chr12:125431294-125473667	DHX37	0.486982	-0.0721645	-0.193132
chr12:133416937-133464204	CHFR	-0.486494	-0.368833	-0.18957
chr13:21141207-21265576	IFT88	-0.490243	-0.0141967	-0.287189
chr13:48807265-48836841	ITM2B	-0.34387	0.127528	-0.0147267
chr13:53028948-53050859	CKAP2	-0.171123	-0.2163	-0.360773
chr13:53226830-53266565	SUGT1	0.573667	0.248553	0.0961929
chr13:76194569-76434006	LMO7	-0.319013	-0.270155	-0.118781
chr13:110959630-111165373	COL4A2	-0.308078	-0.106569	0.0150645
chr13:113951468-113978098	LAMP1	-0.276528	-0.258886	-0.181669
chr13:114239002-114295790	TFDP1	0.18711	-0.015985	-0.093793
chr13:20977805-21100012	CRYL1	-0.493352	0.357482	0.113326
chr13:39452969-39460156	FREM2	-0.49289	-0.703857	-0.739336
chr13:51935700-52027275	INTS6	-0.221143	-0.0490556	-0.217394
chr13:100741268-101239246	A2LD1	-1.05093	0.307945	-0.162745
chr13:113829714-113919722	PCID2	0.35372	0.192491	0.353671
chr14:24563482-24573339	PCK2	-0.480441	-0.0188025	-0.0525794
chr14:24836144-24848810	NFATC4	-0.639888	0.177634	0.950768
chr14:31028328-31089216	G2E3	-0.278581	-0.20851	-0.372813
chr14:35514112-35552698	FAM177A1	0.282114	0.350798	0.138616
chr14:45431402-45543636	FAM179B	-0.321496	0.0622078	0.0466722
chr14:53241834-53258386	GNPNAT1	-1.81313	-0.178391	0.422109
chr14:55595934-55612282	LGALS3	1.41967	0.49719	0.154709
chr14:64319682-64693167	SYNE2	-0.744416	0.0323416	-0.109687
chr14:68286495-69062755	RAD51B	-1.09959	-0.30238	-0.352902
chr14:69951405-69998304	PLEKHD1	0.64275	0.345108	0.529181
chr14:75179849-75203942	FCF1	0.828991	0.0273657	-0.241833
chr14:75230031-75304013	YLPM1	-0.216637	-0.313984	-0.376762
chr14:77924214-77935816	AHSA1	0.468785	0.0948228	-0.0664817
chr14:91580356-91691876	C14orf159	-0.506063	0.043724	0.00266947
chr14:96968719-97033484	PAPOLA	0.217346	-0.205087	-0.149794
chr14:102430854-102517360	DYNC1H1	-0.289519	-0.874206	-0.622653
chr14:102969808-102976128	ANKRD9	14	14	0
chr14:103995519-104003461	TRMT61A	0.607681	0.523214	0.260443
chr14:105403550-105444694	AHNAK2	0.962886	0.427931	0.174092
chr14:23389732-23398661	PRMT5	0.270365	0.0135863	-0.0784892
chr14:23527683-23564823	ACIN1	0.195902	0.0351574	0.29182
chr14:24649146-24658124	IPO4	0.602897	0.017591	-0.117009
chr14:38058285-38064591	FOXA1	-0.724904	-0.110684	0.455456
chr14:45393481-45431179	KLHL28	-0.426203	-0.18882	-0.232526
chr14:47306540-48144157	MDGA2	-0.498711	0.115418	-0.086086
chr14:52456227-52535946	NID2	0.495822	0.0804306	0.323515
chr14:52897263-53019301	TXNDC16	-0.474716	0.127965	-0.123961
chr14:53241834-53258386	GNPNAT1	0.323088	0.0865737	-0.503925
chr14:55614711-55658396	DLGAP5	-0.341957	-0.511302	-0.607063
chr14:61176255-61191048	SIX4	-0.324103	-0.258889	-0.263455
chr14:70232999-70238723	SRSF5	0.746385	1.1097	1.79898
chr14:74486058-74551196	ALDH6A1	-0.424601	-0.106763	-0.150577
chr14:74946605-75053007	NPC2	-0.282382	0.0383112	0.0387248
chr14:81726799-81902781	STON2	-0.447462	-0.426872	0.131259
chr14:102547074-102606086	HSP90AA1	0.554987	0.0126585	0.105635
chr14:105403550-105444694	AHNAK2	1.97221	-0.590798	0.599107
chr14:105607980-105635161	JAG2	0.445243	0.198234	0.601783
chr15:25200069-25223785	SNRPN	-0.230321	0.094625	-0.155778
chr15:25293729-25367623	IPW	-0.330214	-0.0209285	-0.0208283
chr15:39873279-39890981	THBS1	0.528241	2.10273	0.155078
chr15:41523352-41574089	CHP	-0.218746	0.0221285	0.0118644
chr15:41576166-41673356	NUSAP1	-0.302031	-0.240658	-0.340458
chr15:44580867-44707959	CASC4	-0.306795	0.14849	0.0587914
chr15:44829264-44955876	EIF3J	0.391327	0.305019	0.221296
chr15:50569380-50650503	GABPB1	2.03012	-14	-14
chr15:52043757-52108567	TMOD2	-14	0.279967	0.0103442
chr15:57668704-57842921	CGNL1	-0.813918	0.0571258	0.509964
chr15:59279864-59389253	RNF111	-0.259319	-0.127669	-0.235215
chr15:59397283-59417344	CCNB2	-0.376486	-0.454846	-0.541964
chr15:69706387-69740768	KIF23	-0.298775	-0.371975	-0.447352
chr15:71407992-72075722	THSD4	-0.560982	0.418423	0.649219
chr15:72978525-73030817	BBS4	-0.31246	0.188339	0.0838638
chr15:75076820-75095539	CSK	0.486665	0.0175946	0.236888
chr15:75541488-75748156	NEIL1	0.703319	0.740586	1.74526
chr15:78441666-78463114	IDH3A	0.288252	0.000794643	-0.166608
chr15:78832746-78841746	PSMA4	0.193289	-0.00652369	-0.178749
chr15:80696691-80890279	ARNT2	-0.437415	-0.0941882	-0.0812524
chr15:89787188-89878050	FANCI	-0.177808	-0.126984	-0.378207
chr15:90118753-90198682	C15orf42	-0.40909	-0.51985	-0.591507
chr15:90931468-91045475	IQGAP1	-0.16488	-0.318158	-0.359692
chr15:91414326-91426688	FURIN	0.403926	-0.086609	0.34558
chr15:34517194-34629961	SLC12A6	-0.405646	-0.242585	-0.246175
chr15:41271076-41408340	INO80	0.263182	-0.186688	-0.154269
chr15:43825659-44065633	PPIP5K1	-0.529918	-0.0209254	-0.0539451
chr15:44829264-44955876	SPG11	-0.231306	-0.382965	-0.405332
chr15:48431480-48470558	MYEF2	-0.367221	0.122747	0.266583
chr15:52839248-52861358	ARPP19	-0.145961	-0.0739688	-0.254038
chr15:55831083-55880281	PYGO1	-0.272341	0.149598	0.0654161
chr15:60639349-60690222	ANXA2	0.394388	0.132414	-0.0215779
chr15:62144585-62352664	VPS13C	-0.320016	-0.376698	-0.430906
chr15:63615456-63674079	CA12	1.80601	2.2644	0.186645
chr15:72114539-72410422	MYO9A	-0.326225	-0.467102	-0.35932
chr15:72491368-72523727	PKM2	0.461246	-0.128011	-0.00105582
chr15:73735498-73925753	NPTN	-0.225535	0.0390339	-0.0239776
chr15:75192326-75199462	C15orf17	-0.375042	0.287573	0.407107
chr15:89420518-89438857	HAPLN3	0.405253	-0.789083	-0.730972
chr15:89787188-89878050	POLG	0.431211	0.216676	0.388282
chr15:91509266-91537804	PRC1	-0.147358	-0.248923	-0.253825
chr16:577855-604636	SOLH	0.493241	0.191115	0.41555
chr16:2787076-2822322	SRRM2	-0.162434	-0.248007	-0.0607567
chr16:3070312-3072418	TNFRSF12A	0.767971	0.0714575	0.343521
chr16:3493667-3536963	NAA60	0.445507	0.255044	0.351978
chr16:10622011-10673817	EMP2	-0.319372	-0.159269	-0.382378
chr16:20775311-20860990	ACSM3	-0.440433	-0.027839	-0.162108
chr16:27325250-27376099	IL4R	0.416729	0.546013	0.259062
chr16:30541394-30569690	ZNF764	1.39264	0.593631	-0.848099
chr16:30899082-30905399	BCL7C	-14	-0.258081	0.826532
chr16:31191430-31206192	FUS	0.227419	-0.0270151	-0.0138349
chr16:50099880-50140336	HEATR3	0.510639	0.18201	-0.0936663
chr16:56485423-56756276	OGFOD1	0.377198	0.00702692	-0.0427404
chr16:56485423-56756276	MT2A	1.08357	0.472895	0.0893529
chr16:57653518-57699242	GPR56	0.144147	-0.258349	-0.157886
chr16:67187985-67193812	TRADD	0.941969	0.962454	1.02651
chr16:68771191-68870883	CDH1	-0.186623	-0.00131171	-0.0134572
chr16:69151818-69202937	CIRH1A	0.374095	-0.01192	-0.182634
chr16:75032914-75150670	ZNRF1	0.408376	0.042343	0.207131
chr16:75505941-75529335	CHST6	-0.414132	-0.109686	0.0141124
chr16:88636788-88698373	ZC3H18	0.385363	-0.0305334	0.358577
chr16:88772890-88851618	CTU2	0.641308	0.599896	0.545112
chr16:89939989-89978935	TCF25	-0.218476	0.0429483	0.0557908
chr16:1543351-1662109	IFT140	-0.511712	0.165627	0.420192
chr16:3661766-3767598	TRAP1	0.215046	-0.0164893	0.0340114
chr16:15688225-15737023	KIAA0430	-0.291133	-0.306189	-0.18582
chr16:28109294-28223285	XPO6	0.275119	0.00522308	0.0833766
chr16:28565188-28634907	SULT1A1	-0.508394	0.0783532	0.168666
chr16:30541394-30569690	ZNF747	-0.462246	0.0321634	0.0706322
chr16:30759387-30787628	C16orf93	0.797731	0.977247	0.991866
chr16:66541905-66584315	TK2	-0.879039	-0.212521	-0.101194
chr16:67187985-67193812	TRADD	1.46753	1.13154	1.7704
chr16:69741077-69760627	NQO1	0.493307	-0.050773	-0.029754
chr16:70277648-70323442	AARS	-0.242427	-0.24292	-0.182071
chr16:87863624-87903105	SLC7A5	0.294094	0.59509	-0.200679
chr16:87958332-87970112	CA5A	-1.07585	0.164722	-0.0412055
chr16:88772890-88851618	FAM38A	0.459423	-0.109051	0.449414
chr17:1397330-1420182	INPP5K	-1.44107	-0.533344	-1.22726
chr17:2207247-2240717	SRR	-0.351003	0.243784	-0.157018
chr17:5402749-5404049	LOC728392	-1.22038	0.488221	0.992705
chr17:7461544-7482348	SENP3-EIF4A1	0.215445	-0.0307942	-0.136662
chr17:19437166-19482346	SLC47A1	0.642782	0.526315	0.671255
chr17:19558606-19581178	ALDH3A2	0.295061	0.20155	0.0324293
chr17:25621105-25640899	WSB1	-0.301592	-0.00230556	0.0212182
chr17:31254927-31268807	TMEM98	-0.481705	0.409224	0.251333
chr17:33570067-33597258	SLFN5	-0.597668	0.291219	0.0566623
chr17:33895130-34053436	AP2B1	-0.217888	-0.203383	-0.17038
chr17:35306174-35414173	AATF	0.368111	0.205545	0.0162074
chr17:38444085-38459533	CDC6	0.292952	0.173503	-0.155816
chr17:41476352-41485862	ARL4D	1.24528	1.0761	0.302236
chr17:42422793-42430511	GRN	-0.318243	-0.0543449	0.0890644
chr17:48133339-48167861	ITGA3	0.466876	-0.0868517	0.229445
chr17:48503518-48552625	ACSF2	-0.430058	0.231148	0.47694
chr17:55163077-55198738	AKAP1	0.338168	0.120882	0.0319797
chr17:57232859-57284329	PRR11	-0.440975	-0.411141	-0.223342
chr17:57642885-57685872	DHX40	-0.199579	0.0639817	0.034214
chr17:65821779-65980494	BPTF	-0.247957	-0.442277	-0.480763
chr17:73452663-73511627	KIAA0195	-0.285112	-0.0781443	0.23004
chr17:73512608-73571290	LLGL2	0.362477	0.344329	0.71122
chr17:73717515-73753899	ITGB4	0.323509	-0.218843	0.0504867
chr17:75084724-75213187	SEC14L1	-0.256678	-0.205868	0.100746
chr17:75277491-75496678	2009-09-01	0.328191	0.148791	0.202377
chr17:80193005-80197436	SLC16A3	0.532493	0.620476	0.529235
chr17:80415188-80448410	NARF	0.554876	0.347419	0.297865
chr17:906731-1083131	ABR	0.366446	0.185207	0.415032
chr17:2207247-2240717	TSR1	0.371397	0.205415	-0.138368
chr17:2592679-2615031	KIAA0664	0.606252	0.155018	0.623341
chr17:3763616-3796337	CAMKK1	0.852537	0.521369	0.212616
chr17:5322671-5342480	C1QBP	0.34698	0.0350759	-0.2433
chr17:7284364-7307458	C17orf61	-0.468437	-0.0142665	0.136733
chr17:8075793-8079715	TMEM107	-0.707664	0.323027	0.333699
chr17:19581235-19620043	SLC47A2	1.05836	0.496866	0.218379
chr17:19641197-19651822	ALDH3A1	1.63841	-0.0205001	0.416327
chr17:19674142-19771239	ULK2	-0.437792	0.0573569	-0.0771333
chr17:27206355-27507407	MYO18A	0.329539	0.0387733	0.259001
chr17:30189056-30228751	UTP6	0.939895	0.285032	0.0770279
chr17:33335882-33448541	RAD51D	-0.250528	-0.0327696	0.0169118
chr17:35874899-35969486	SYNRG	-0.194015	-0.303732	-0.431319
chr17:38544768-38570255	TOP2A	-0.452015	-0.431256	-0.483951
chr17:39078951-39093836	KRT23	-0.576585	-0.427316	-0.516657
chr17:39775691-39778757	KRT17	2.02871	-0.497728	0.141779
chr17:39910687-39943048	JUP	-0.158206	-0.499493	-0.250653
chr17:40265043-40273382	KAT2A	0.400305	0.00836997	0.187041
chr17:41476352-41485862	ARL4D	0.901987	0.760674	0.0666709
chr17:41717356-41739317	MEOX1	-0.530121	0.310822	0.189464
chr17:42430590-42441235	FAM171A2	-0.563361	-0.0870308	0.24671
chr17:43100671-43138477	DCAKD	-0.690549	0.0680746	0.15167
chr17:43225786-43238846	HEXIM1	0.423655	0.403347	0.483226
chr17:47481417-47492242	PHB	0.298932	-0.0408761	-0.120356
chr17:48261456-48279000	COL1A1	-0.304679	-0.00752164	0.71813
chr17:49254778-49337731	MBTD1	-0.437847	-0.416982	-0.214602
chr17:55938897-55980750	CUEDC1	0.241972	0.294009	0.58347
chr17:57184430-57232800	SKA2	-0.371032	-0.0860641	-0.167816
chr17:59756546-59940920	BRIP1	-0.427303	-0.173276	-0.777033
chr17:61851566-61920351	FTSJ3	0.232726	-0.0807513	-0.0742984
chr17:63005406-63052920	GNA13	0.749185	0.473259	0.102618
chr17:70399462-70588943	LOC100499467	1.60986	1.08487	0.646407
chr17:73512608-73571290	TSEN54	-0.734141	-0.0982197	0.105245
chr17:74553845-74582993	ST6GALNAC2	-0.373703	-0.0851611	0.0369752
chr17:74675650-74707056	MXRA7	-0.341569	0.247043	0.127076
chr17:75955327-76128488	TMC6	0.468313	0.34186	0.679906
chr17:79218716-79228062	SLC38A10	-0.344367	-0.103276	0.113747
chr17:79506535-79519429	C17orf70	0.375561	0.250592	0.458902
chr17:80351045-80408707	C17orf62	0.388758	0.502643	0.366136
chr18:2916991-3013119	LPIN2	1.29342	1.25064	2.2761
chr18:9318566-9402422	TWSG1	-0.32631	0.000739113	-0.185224
chr18:20494060-20606772	RBBP8	0.184533	0.555927	0.101848
chr18:20714527-20840434	CABLES1	0.539574	1.07833	0.712037
chr18:21269561-21514585	LAMA3	0.9855	0.0935697	0.081837
chr18:51795848-51824604	POLI	-0.521943	0.243521	0.098677
chr18:56337806-56421239	MALT1	0.360874	-0.842518	-0.471572
chr18:77724581-77748570	HSBP1L1	-0.627811	-0.108873	0.2707
chr18:25529560-25757769	CDH2	-0.455512	0.747734	0.773926
chr18:31431063-31802434	NOL4	-1.23943	0.144084	0.116253
chr18:46446222-46477847	SMAD7	0.609607	-0.163374	0.0988886
chr18:52889561-53303188	TCF4	-0.501797	0.337354	0.31787
chr18:59711330-59854289	PIGN	-0.352298	-0.102726	-0.333979
chr18:65173741-65183326	DSEL	0.49434	-0.0295722	-0.180496
chr19:751078-764319	C19orf21	0.36539	0.561258	0.188747
chr19:1103935-1106829	GPX4	-0.274019	-0.0980543	0.0754137
chr19:8274216-8331336	CERS4	-0.532261	0.236403	0.288619
chr19:11708234-12444534	ZNF439	-0.196301	0.0576894	-0.0659006
chr19:12757000-12792701	WDR83	0.565485	0.388494	0.680177
chr19:13228804-13251963	NACC1	0.229382	-0.0659581	0.202676
chr19:16178316-16213857	TPM4	-0.218546	-0.0373157	-0.11175
chr19:24269975-24312719	ZNF254	0.539415	0.293167	1.01194
chr19:36936020-36980463	ZNF566	-1.23925	-0.201417	-0.0279129
chr19:39390569-39399535	NFKBIB	0.513418	0.072285	0.397714
chr19:39923784-39926628	RPS16	1.13007	1.40717	1.74027
chr19:40854331-40884396	PLD3	-0.199883	0.065301	0.269648
chr19:41099071-41135950	LTBP4	-0.380925	0.20755	0.463175
chr19:41768390-41813811	HNRNPUL1	-0.119094	-0.290586	-0.0894575
chr19:42829760-42882921	MEGF8	-0.327882	-0.240502	0.0827695
chr19:45147097-45169730	PVR	0.348675	0.124135	0.100082
chr19:45312323-45324678	BCAM	-0.401276	0.0930644	0.502027
chr19:49468483-49470139	FTL	0.396132	-0.102358	0.300282
chr19:50321535-50370822	MED25	-0.299616	0.0148542	0.3674
chr19:53115450-53696619	ZNF83	0.679243	1.3592	1.43141
chr19:53115450-53696619	ZNF320	-0.433594	-0.511999	-0.149551
chr19:55587220-55601444	EPS8L1	0.407159	0.356267	0.584221
chr19:58144534-58400442	LOC100293516	-0.248643	-0.0471489	-0.0368077
chr19:6426047-6459814	SLC25A23	-0.246602	-0.16509	0.0888307
chr19:7933604-7939326	FLJ22184	-0.456136	-0.480555	0.0975703
chr19:7991580-8008708	TIMM44	0.617727	0.226059	0.280729
chr19:8130286-8212385	FBN3	-0.778788	0.399165	0.916234
chr19:8386396-8388321	KANK3	-0.425885	0.142592	0.191344
chr19:11274942-11308404	KANK2	0.34454	-0.106026	-0.00901353
chr19:12571997-12595632	ZNF709	-0.477608	0.163518	0.0634818
chr19:12873795-12886434	HOOK2	0.424646	0.424885	0.751386
chr19:13215713-13227563	TRMT1	0.467292	-0.0859367	0.0783991
chr19:16660375-16739015	SLC35E1	0.26119	0.0355658	0.089739
chr19:17003760-17137625	CPAMD8	-0.735317	0.157548	0.58828
chr19:19867180-19887222	LOC284440	-1.06034	0.283425	0.212547
chr19:21906766-22018970	ZNF100	-1.14693	-0.337141	0.169577
chr19:23921996-23941693	ZNF681	-0.731432	-0.417176	-0.273517
chr19:23945766-24047876	RPSAP58	-4.6523	-14	0.348463
chr19:24269975-24312719	ZNF254	-0.912852	-0.148638	-0.876156
chr19:36825354-36870105	ZFP14	-0.471039	0.21405	0.0527353
chr19:37001588-37019272	ZNF260	-0.265425	0.0475484	-0.14445
chr19:38122697-38146313	ZFP30	-0.472826	0.335138	0.0657408
chr19:39498170-39523198	FBXO27	1.6831	1.05008	1.14856
chr19:49588410-49611925	SNRNP70	0.70112	1.05527	1.74864
chr19:52359055-52674896	ZNF350	-0.202607	0.10635	0.038477
chr19:52772823-53103405	ZNF578	2.57321	2.83046	1.66056
chr19:53115450-53696619	ZNF28	-0.148044	0.239078	0.113209
chr19:53837001-53999496	ZNF845	14	14	14
chr19:55670030-55678018	C19orf51	-1.21183	0.353226	0.29956
chr19:58488438-58518643	ZNF606	-0.523147	0.275503	0.370365
chr2:1635510-1748330	PXDN	-2.01125	-1.3402	-0.468898
chr2:9346893-9563988	ASAP2	-0.29962	-0.207967	-0.0601823
chr2:24346740-24392507	LOC375190	-1.4394	0.429122	0.116398
chr2:26624783-26679579	CCDC164	-1.46315	0.685754	0.608564
chr2:29117532-29171241	WDR43	0.411206	0.331839	-0.115073
chr2:32582095-32843965	BIRC6	-0.21014	-0.622626	-0.630433
chr2:33172135-33624650	LTBP1	-0.379449	-0.212975	-0.205364
chr2:38148071-38302686	FAM82A1	0.541493	0.256889	0.103388
chr2:46769866-46853070	RHOQ	-0.362713	-0.0364127	0.0780814
chr2:69240275-69476459	ANTXR1	-0.307305	-0.0713401	0.00501267
chr2:73114511-73119289	SPR	0.709948	0.409173	0.517034
chr2:73612885-73912694	ALMS1	-0.32156	-0.55295	-0.501195
chr2:74425689-74570534	MTHFD2	-0.280612	0.00326892	-0.155687
chr2:74682149-74688018	INO80B-WBP1	-0.446083	0.0609932	0.138982
chr2:74881392-74909185	SEMA4F	0.28069	0.170066	0.268796
chr2:75062441-75120481	HK2	0.712289	0.355332	0.138925
chr2:85766100-85788657	MAT2A	-0.530158	0.406787	0.102117
chr2:95691380-95720690	MAL	-0.355021	-0.489531	-0.45191
chr2:95940193-95962425	PROM2	-0.589859	-0.129941	0.0511093
chr2:97001483-97059666	NCAPH	-0.382515	-0.461263	-0.531171
chr2:102608305-102644900	IL1R2	0.950949	-0.282854	-0.442529
chr2:103236021-103329037	SLC9A2	0.537104	0.361871	-0.122051
chr2:112895961-112949847	FBLN7	-1.05401	0.259149	0.585471
chr2:128458680-128615729	POLR2D	-0.464403	-0.611861	-0.758339
chr2:128848753-128953314	UGGT1	-0.235894	-0.39939	-0.616368
chr2:129022240-129076428	HS6ST1	0.440232	-0.419031	0.351053
chr2:132285467-132291278	CCDC74A	-1.02917	0.364802	0.607498
chr2:136289048-136482840	R3HDM1	-0.190387	-0.345294	-0.30213
chr2:155555092-155714286	KCNJ3	-0.7574	-0.428068	0.130483
chr2:160175458-160491765	BAZ2B	-14	-7.60385	-0.769015
chr2:171673199-171717659	GAD1	0.90968	0.756214	1.20123
chr2:179278633-179312215	PRKRA	-0.378534	-0.125042	-0.00942486
chr2:189839023-189877472	COL3A1	-0.322565	-0.0523228	0.200164
chr2:191513653-191557586	NAB1	-0.215511	0.119858	0.133624
chr2:191745546-191830274	GLS	0.321607	-0.144018	-0.0413265
chr2:196521851-196933536	SLC39A10	0.334964	-0.0380335	-0.0633485
chr2:198350801-198418423	HSPD1	0.478956	0.058275	0.0729168
chr2:198350801-198418423	HSPE1-PHOCN	0.359433	0.0161326	-0.0881131
chr2:201170603-201346986	SPATS2L	0.377613	0.236302	0.290515
chr2:203130455-203168530	NOP58	0.395501	0.260129	0.155472
chr2:207630111-207660911	FASTKD2	0.281918	0.0704638	-0.373623
chr2:208576263-208621060	CCNYL1	0.381622	0.0995425	-0.119556
chr2:219524378-219528307	BCS1L	0.389338	0.123187	0.525842
chr2:232826292-233352532	ALPP	0.935779	1.61647	-0.135806
chr2:235860627-235964360	SH3BP4	0.50954	-0.00456095	-0.0311546
chr2:241388833-241407512	GPC1	0.615717	0.278633	0.34806
chr2:217970-264115	SH3YL1	-0.306631	0.352737	0.240479
chr2:27422454-27434828	SLC5A6	0.486135	0.195882	0.0420194
chr2:27532168-27545969	MPV17	-0.541444	-0.0023194	-0.135151
chr2:27666713-27712607	IFT172	-0.327767	-0.145594	0.0739785
chr2:37424411-37458741	CEBPZ	0.308001	0.125146	0.063772
chr2:56087502-56151298	EFEMP1	-1.03356	0.51813	0.883393
chr2:64319785-64370509	PELI1	-0.351366	-0.187653	0.199606
chr2:70436574-70475786	TIA1	-0.256552	-0.0365687	-0.0895795
chr2:73441365-73454359	SMYD5	1.48439	-14	1.45189
chr2:74682149-74688018	INO80B	14	14	14
chr2:85543724-85581821	TGOLN2	-0.158998	-0.0975175	-0.0853873
chr2:86726722-86790620	RNF103	-0.1992	0.0749951	-0.0691128
chr2:95752805-95787754	MRPS5	0.377071	-0.0743259	0.169617
chr2:102759364-102796334	IL1R1	1.23073	1.54799	1.11338
chr2:105880761-105946148	TGFBRAP1	0.53824	0.123728	-0.0224268
chr2:105977061-106015681	FHL2	0.53684	1.84639	0.512816
chr2:113493927-113522254	CKAP2L	-0.377606	-0.516802	-0.562344
chr2:113971572-114036572	PAX8	0.438913	0.223072	0.577958
chr2:130783568-130808893	LOC440905	-0.547091	0.449008	0.373669
chr2:135957265-136288806	ZRANB3	-0.846154	-0.222627	-0.504816
chr2:151324709-151344180	RND3	0.931116	0.0764095	0.286816
chr2:160175458-160491765	BAZ2B	-0.325216	-0.0468215	-0.0551111
chr2:170386260-170430424	FASTKD1	0.350498	0.157579	0.127288
chr2:177028804-177053176	LOC401022	-0.396082	0.146073	0.116241
chr2:178487976-178787564	PDE11A	-0.820591	-0.215289	-0.282062
chr2:190425154-190445537	SLC40A1	-0.589993	0.349579	0.752792
chr2:196998294-197036336	STK17B	-0.33057	-0.285401	-0.470754
chr2:198350801-198418423	HSPD1	0.301886	-0.0284863	-0.05318
chr2:200793633-200828901	TYW5	0.584116	0.620061	0.391092
chr2:201717731-201729467	CLK1	-0.562126	0.06317	0.285776
chr2:216225178-216300854	FN1	-0.296414	-0.610066	-0.494236
chr2:217536824-217556221	IGFBP5	0.620282	-0.329605	-0.0577426
chr2:230222344-230579286	DNER	-0.528917	-0.404386	-0.511373
chr2:239969863-240322643	HDAC4	0.504183	-0.267175	-0.116745
chr20:10199476-10288066	SNAP25	-0.880077	0.423081	0.878294
chr20:13976145-16033841	MACROD2	-1.16758	0.363332	0.301852
chr20:17949562-17971765	C20orf72	-0.339208	-0.0191209	-0.272264
chr20:18269120-18304316	ZNF133	-0.778721	0.23192	-0.0235967
chr20:18488187-18542116	SEC23B	0.310645	0.218986	0.00190267
chr20:24986886-24990020	ACSS1	-0.560552	0.151747	0.375928
chr20:30326903-30389704	TPX2	-0.258622	-0.522299	-0.573015
chr20:42219557-42275865	IFT52	-0.362474	-0.0205906	0.0783423
chr20:42295708-42345126	MYBL2	-0.464198	-0.220594	-0.207576
chr20:44563316-44576705	PCIF1	-0.429427	0.0100421	0.042263
chr20:45837867-45985628	ZMYND8	-0.89564	-0.333207	-0.155483
chr20:62887047-62907660	PCMTD2	-0.355503	0.284002	0.22636
chr20:3208011-3219887	SLC4A11	0.622893	0.287472	0.567112
chr20:3734155-3749726	C20orf27	0.576081	0.190653	0.229298
chr20:5986705-6034706	LRRN4	-1.05995	0.585672	0.624369
chr20:17594322-17662928	RRBP1	0.199776	-0.163305	-0.0468304
chr20:32144449-32262264	NECAB3	0.470303	0.0133691	0.306994
chr20:33703159-33735161	EDEM2	0.448624	0.346057	0.209324
chr20:35405844-35492087	KIAA0889	-0.382222	-0.42429	-0.449398
chr20:37576514-37581648	FAM83D	-0.384865	-0.379867	-0.213868
chr20:40030677-40247133	CHD6	-0.318925	-0.216471	-0.227805
chr20:44978110-44993071	SLC35C2	-0.388	-0.023142	0.241165
chr20:50212922-50384963	ATP9A	-0.221892	-0.047897	0.0392218
chr20:52183604-52214231	ZNF217	-0.381426	-0.545295	-0.174167
chr20:60711772-60718491	PSMA7	0.245979	0.0647025	0.0182937
chr21:17442841-17999541	C21orf34	-1.12777	0.331975	0.121162
chr21:35014783-35261609	ITSN1	0.461923	-0.21981	0.194713
chr21:38445570-38575458	TTC3	-0.245497	-0.126088	-0.0495747
chr21:46825073-46934332	COL18A1	-0.380305	-0.0680645	0.0246299
chr21:40556098-40693511	BRWD1	-0.600958	-0.463918	-0.175407
chr21:40714228-40721048	HMGN1	-0.148831	0.131949	0.0878386
chr21:42836253-42880085	TMPRSS2	-0.325536	0.0172198	0.0622794
chr21:44263114-44299816	WDR4	0.419929	0.600537	0.278472
chr21:44472844-44496472	CBS	-0.337031	-0.014	0.338303
chr21:47608359-47648738	LSS	-0.366649	-0.452423	-0.387468
chr22:38245378-38285096	EIF3L	-0.236852	0.0795685	0.141744
chr22:39257465-39268315	CBX6	1.25716	-5.59367	-14
chr22:40440820-40731812	TNRC6B	-0.349333	-0.703103	-0.569488
chr22:41253084-41328823	XPNPEP3	-0.368745	-0.22452	-0.491049
chr22:41488302-41576086	EP300	-0.28291	-0.502247	-0.502459
chr22:42229097-42303308	SREBF2	-0.195907	-0.246002	-0.171205
chr22:22020272-22090071	YPEL1	-2.94507	0.304867	0.387368
chr22:29902080-29949741	THOC5	0.45344	0.238749	0.225415
chr22:30972611-31023213	PES1	0.475306	0.223451	0.21522
chr22:36134781-36424607	RBFOX2	-0.19102	-0.160059	0.0504739
chr22:36677022-36792555	MYH9	-0.191671	-0.446723	-0.233332
chr22:39130350-39152024	SUN2	-0.47378	-0.187666	0.00332753
chr22:43562582-43582013	TTLL12	0.397313	0.0255266	-0.0167019
chr22:46756730-46933385	CELSR1	-0.364634	-0.394895	-0.183976
chr22:50713406-50746065	PLXNB2	-0.180273	-0.161372	0.0670891
chr3:3841613-3889929	LRRN1	-0.587878	-0.276701	-0.125908
chr3:9958757-9975305	IL17RC	-0.531098	0.0731967	0.517395
chr3:14444095-14583588	SLC6A6	0.395991	0.179721	-0.480041
chr3:15643249-15690490	BTD	-0.511666	-0.0430162	-0.409298
chr3:42543598-42579066	VIPR1	0.675844	0.222825	0.358262
chr3:42850948-42910781	CCBP2	-0.500507	-0.0650207	-0.21502
chr3:44803208-44894748	KIF15	-0.49055	-0.439595	-0.439384
chr3:49977476-50156458	RBM5	0.174335	0.208419	0.490541
chr3:50378540-50379130	ZMYND10	-1.10942	0.548942	0.785158
chr3:52579223-52740048	GNL3	0.408113	0.308644	-0.0057554
chr3:56591183-56717301	CCDC66	0.491899	0.422264	0.569214
chr3:89156673-89531292	EPHA3	-0.446212	-0.15272	-0.173346
chr3:100211421-100296295	TMEM45A	-0.518171	-0.0236533	-0.0879302
chr3:108260341-108413693	DZIP3	-0.391414	-0.072813	-0.0873436
chr3:113775596-113807270	QTRTD1	0.496455	0.10832	-0.100456
chr3:119421868-119486164	C3orf15	-0.433971	0.638785	0.627014
chr3:122513900-122611263	DIRC2	-0.417971	-0.126143	-0.202415
chr3:133292433-133309118	CDV3	0.215504	0.352226	-0.0799658
chr3:134074187-134093422	AMOTL2	14	14	14
chr3:140660620-140699108	SLC25A36	-0.196669	0.420964	0.0715182
chr3:141595434-141645540	ATP1B3	0.319148	0.0729253	-0.0457131
chr3:160117429-160152810	SMC4	-0.243356	-0.3342	-0.442296
chr3:172468494-172539335	ECT2	-0.35003	-0.224486	-0.486891
chr3:174577103-175527260	NAALADL2	-1.52349	0.106124	-0.285624
chr3:180319917-180397283	TTC14	0.240262	0.394058	0.467405
chr3:183353410-183402304	KLHL24	-0.661282	-0.435299	-0.0490506
chr3:183903862-183914906	ABCF3	0.420961	0.374084	0.26547
chr3:184032282-184053195	EIF4G1	0.209818	-0.294495	-0.221209
chr3:190088733-190129932	CLDN16	0.765787	-0.52338	0.268786
chr3:10004147-10143687	CIDECP	0.423036	0.473275	0.201653
chr3:11314009-11762220	VGLL4	-0.425362	-0.482469	-0.0745117
chr3:13357727-13461809	NUP210	-0.303259	-0.0446748	-0.0757628
chr3:15708723-15901082	ANKRD28	-0.418494	-0.13824	0.0399354
chr3:17198653-17784240	TBC1D5	-0.29905	-0.13471	-0.0796291
chr3:18386875-18486271	SATB1	-0.460909	-0.0987067	0.433146
chr3:33038061-33138694	GLB1	-0.244023	-0.152413	-0.191887
chr3:39448183-39454118	RPSA	1.05054	0.93875	1.25509
chr3:48331735-48342880	NME6	-0.300747	-0.0414653	-0.153735
chr3:48663058-48672547	SLC26A6	0.466734	0.401871	0.772272
chr3:49044636-49131610	DALRD3	-0.387189	0.292093	0.400836
chr3:49158544-49170599	LAMB2	-0.415298	-0.10105	0.176311
chr3:52109166-52188706	POC1A	-0.414182	-0.258993	-0.0983032
chr3:52579223-52740048	PBRM1	-0.203127	-0.228395	-0.353359
chr3:56761445-57112683	ARHGEF3	0.34443	-0.483007	-0.368125
chr3:88101099-88208574	CGGBP1	-0.238942	0.0300109	-0.0581942
chr3:120112382-120169943	FSTL1	-0.416547	0.168969	0.294642
chr3:121706169-121741234	ILDR1	-0.554527	0.00508942	-0.0159869
chr3:124801479-124931609	SLC12A8	0.466292	0.141795	0.412983
chr3:125246424-125314381	OSBPL11	0.281244	0.0404075	-0.538447
chr3:134074187-134093422	AMOTL2	0.581109	0.191201	0.348021
chr3:138213119-138313168	CEP70	-0.316873	0.100964	0.0335879
chr3:139236275-139258671	RBP1	-0.530446	0.287425	0.584656
chr3:142025448-142166875	XRN1	-0.435752	-0.289646	-0.373801
chr3:150281954-150320983	EIF2A	-0.691198	0.342204	0.437917
chr3:159974771-160117320	IFT80	-0.345561	0.287328	0.376616
chr3:168801285-169381583	MECOM	-0.156986	-0.268743	-0.239424
chr3:176737230-176915052	TBL1XR1	-0.200525	-0.0808669	-0.245301
chr3:182732946-182833439	MCCC1	-0.282982	-0.0328207	-0.204708
chr3:184908411-185000196	EHHADH	-0.607691	0.00663555	-0.163054
chr3:187868361-188608460	LPP	-0.647867	-0.613066	-0.824904
chr3:187868361-188608460	LPP	-0.524013	-0.270368	-0.529361
chr3:187868361-188608460	LPP	-0.5155	-0.336998	-0.417071
chr3:189674516-189838908	LEPREL1	1.17969	0.52038	0.309339
chr4:1873122-1983961	WHSC1	-0.195865	-0.107799	-0.0760954
chr4:3465032-3496296	DOK7	0.793402	0.952388	-0.0999062
chr4:4387982-4712664	LOC100507266	-0.715164	-0.151366	-0.0375939
chr4:6784393-6885899	KIAA0232	-0.230577	0.0970356	0.0578739
chr4:15937220-15939998	FGFBP1	1.53381	-0.592043	-0.644904
chr4:20253663-20622273	SLIT2	0.390321	-0.260525	-0.447305
chr4:37828281-37864869	PGM2	0.329933	0.135167	-0.118958
chr4:41992522-42089689	SLC30A9	-0.180581	0.0346055	-0.0265599
chr4:78078356-78091215	CCNG2	-0.506081	-0.484764	-0.154203
chr4:78978148-79465589	FRAS1	-0.685441	-0.940694	-0.913088
chr4:87856153-88062206	AFF1	-0.252713	-0.223238	-0.257675
chr4:95917358-96079601	BMPR1B	-0.744208	0.370395	0.199493
chr4:99916787-99984045	METAP1	0.224354	-0.0722394	-0.187417
chr4:119201212-119273922	PRSS12	-0.520274	0.445861	0.479466
chr4:126237007-126414087	FAT4	-0.524214	-0.691805	-0.493019
chr4:139936942-139968720	CCRN4L	0.702922	0.316048	-0.0826862
chr4:140187316-140312264	NAA15	0.305305	-0.0152426	-0.374389
chr4:145915689-146050676	ABCE1	0.29686	0.043001	-0.322981
chr4:184826508-184944681	STOX2	-0.327537	-0.544909	-0.390098
chr4:190395372-190396344	HSP90AA4P	0.554367	-0.0680024	0.0642201
chr4:1717558-1746900	TMEM129	-0.430272	0.108049	0.231382
chr4:1813205-1858779	LETM1	0.263327	0.0306555	-0.0786774
chr4:13570365-13629328	BOD1L	-0.272456	-0.238292	0.0657172
chr4:37454857-37687999	RELL1	0.643092	0.562679	0.629886
chr4:39548190-39640619	C4orf34	-0.445852	0.37696	0.195502
chr4:57843942-57976587	IGFBP7	-0.572349	0.336337	0.393967
chr4:74437299-74486340	RASSF6	-0.968895	0.809693	0.849291
chr4:78978148-79465589	FRAS1	-14	-14	-14
chr4:100869193-100871544	H2AFZ	-0.237868	-0.209315	-0.48606
chr4:103552642-103682614	MANBA	-0.276438	-0.0377741	-0.104403
chr4:113460488-113578850	C4orf21	-0.394624	-0.377824	-0.27519
chr4:119643941-119757326	SEC24D	0.209061	0.147732	-0.0585629
chr4:139085167-139163712	SLC7A11	-0.375644	-0.419522	-0.683193
chr4:151185595-151936715	LRBA	-0.182561	-0.354436	-0.426334
chr4:174246663-174255632	HMGB2	-0.317207	-0.0802527	-0.0354438
chr5:271735-315090	AHRR	0.240371	0.257755	0.129002
chr5:17228415-17277020	BASP1	0.355174	-0.254751	-0.0229454
chr5:21459588-21474757	GUSBP1	0.538699	0.320214	0.550846
chr5:34929697-34959069	DNAJC21	0.266898	0.0765418	-0.0438042
chr5:43602780-43706496	NNT	-0.253994	-0.0620742	-0.168222
chr5:64920480-65017941	C5orf44	-0.259824	0.140411	-0.0857855
chr5:79852573-79866304	ANKRD34B	2.02188	1.41821	1.90721
chr5:89854616-90460035	GPR98	-0.484071	-0.293034	-0.508367
chr5:95066849-95132073	RHOBTB3	-0.463483	0.0582422	0.0456514
chr5:95997740-96149848	CAST	-0.243826	-0.207062	-0.0263939
chr5:96271051-96373218	LNPEP	-0.199215	0.015783	-0.0724842
chr5:102090886-102366808	PAM	-0.42128	0.0865466	0.053996
chr5:112312406-112363261	DCP2	-0.307381	-0.36237	-0.319228
chr5:118406839-118584963	DMXL1	-0.228859	-0.323141	-0.502577
chr5:118788137-118878030	HSD17B4	-0.261666	-0.120458	-0.129073
chr5:132387577-132442141	HSPA4	0.23175	-0.146754	-0.143519
chr5:137273641-137368802	PKD2L2	1.92009	1.88868	1.51034
chr5:139027904-139063466	CXXC5	0.532001	0.0470012	0.0282848
chr5:139781398-139929242	ANKHD1-EIF4EBP3	-0.186182	-0.208102	-0.233745
chr5:140474189-140481668	PCDHB2	-0.535885	-0.108944	0.0270205
chr5:140738186-140749479	PCDHGA8	-0.359966	-0.171071	-0.0192958
chr5:162887516-162918953	HMMR	-0.67844	-0.410837	-0.74304
chr5:169010637-169031782	CCDC99	-0.300019	-0.263582	-0.283322
chr5:172483354-172566291	C5orf41	-0.571781	-0.0919932	0.119767
chr5:176332005-176433795	UIMC1	14	14	14
chr5:6599347-6660100	NSUN2	0.293314	-0.0670722	-0.126054
chr5:36098588-36152045	LMBRD2	-0.385641	-0.109861	-0.336979
chr5:37078317-37249530	C5orf42	-0.272686	-0.134252	-0.0749776
chr5:57749568-57755419	PLK2	0.407897	-0.636226	0.117505
chr5:64813592-64858995	CENPK	-0.521644	-0.0144881	-0.54631
chr5:74666247-74897535	COL4A3BP	0.209935	-0.225056	-0.287054
chr5:76368775-76445282	ZBED3	-0.365192	-0.279079	-0.179612
chr5:77780920-77944648	LHFPL2	0.347994	-0.0670429	-0.156574
chr5:95220801-95297775	ELL2	0.702824	0.161964	0.502464
chr5:111060218-111093915	C5orf13	-0.633277	0.0775735	0.0449334
chr5:114460458-114505568	TRIM36	-0.335214	-0.0869742	-0.123767
chr5:123972609-124084544	ZNF608	-0.754045	-0.45752	0.235695
chr5:127593467-127873918	FBN2	-0.626772	-0.50659	-0.384272
chr5:137492572-137524942	BRD8	-0.247431	-0.115016	0.0211362
chr5:137620956-137667529	CDC25C	-0.564729	-0.420399	-0.423572
chr5:139027904-139063466	CXXC5	0.630281	0.0289548	0.206706
chr5:150273861-150326146	ZNF300	-0.43043	0.319349	0.266065
chr5:178029558-178054122	CLK4	-1.08917	0.152973	0.23731
chr5:180270549-180288286	ZFP62	-0.615713	0.071155	0.155216
chr6:4021526-4065217	PRPF4B	0.188691	0.0815014	0.0883441
chr6:10695069-10710087	PAK1IP1	0.447668	0.356768	-0.16872
chr6:17393735-17558023	CAP2	0.455228	0.134716	0.293629
chr6:28292444-28337037	ZKSCAN3	-0.396139	-0.0555596	0.0187993
chr6:31496738-31514625	MCCD1	0.382174	0.766583	1.19805
chr6:31802446-31807651	C6orf48	-0.234844	0.266394	0.398667
chr6:33176184-33177678	RING1	0.680532	0.672721	0.786575
chr6:33359312-33377702	KIFC1	-0.363445	-0.320801	-0.285721
chr6:41040628-41108573	LOC221442	-0.346256	-0.123401	-0.134626
chr6:43968097-43975540	C6orf223	-0.441639	-0.495488	-0.334306
chr6:44081176-44123256	TMEM63B	-0.322534	-0.0255317	0.146016
chr6:75962580-75982505	TMEM30A	-0.436823	-0.119299	-0.322476
chr6:88117689-88174198	C6orf165	-0.802302	0.387831	0.293523
chr6:89790428-89794879	PNRC1	-0.342534	-0.377167	0.0984777
chr6:114178485-114184653	MARCKS	-0.326718	-0.279013	-0.152639
chr6:116956698-116989973	ZUFSP	-14	-0.793232	-14
chr6:125474860-125584737	TPD52L1	0.293687	0.240405	0.294331
chr6:143381755-143664710	AIG1	-0.441502	0.233319	-0.0149941
chr6:144164484-144185038	LTV1	0.531218	0.0716884	-0.214945
chr6:144606562-145174226	UTRN	-0.42736	-0.380089	-0.462101
chr6:149915176-150039392	LATS1	0.644252	0.490368	-0.0256779
chr6:150518543-150571528	PPP1R14C	0.588823	-0.0680256	-0.174953
chr6:151815174-151942347	C6orf97	-1.30074	0.739361	0.9063
chr6:159291068-159331385	C6orf99	1.50187	0.0162106	-0.054673
chr6:3259161-3438762	SLC22A23	0.856176	0.367919	0.795917
chr6:4995266-5004272	RPP40	0.506829	0.306224	-0.0954947
chr6:26054996-26056713	HIST1H1C	1.63187	-0.153508	-0.103118
chr6:26111611-26124251	HIST1H2BC	-0.441231	-0.171319	-0.237973
chr6:26277226-26285844	HIST1H4H	0.653189	0.0858411	0.10222
chr6:27090158-27100602	HIST1H2BJ	-0.481835	-0.247437	-0.457338
chr6:30667583-30685458	MDC1	-0.224284	-0.320789	-0.0850794
chr6:31606714-31620477	BAG6	-0.215165	-0.168131	-0.0156829
chr6:32083044-32096017	ATF6B	-0.449569	-0.027164	-0.0567713
chr6:33384314-33386065	CUTA	-0.452149	0.0491921	0.18794
chr6:43005354-43021683	CUL7	-0.358557	-0.132102	0.186965
chr6:43489643-43543812	XPO5	0.32553	-0.116727	-0.144037
chr6:46126937-46138717	ENPP5	-0.334488	0.256983	0.183951
chr6:49398071-49431041	MUT	-0.32292	-0.114497	-0.101439
chr6:52284993-52441862	TRAM2	0.380416	-0.083262	0.108376
chr6:52842745-52860178	GSTA4	-0.564428	0.502864	0.226132
chr6:56322784-56607175	DST	-0.444258	-0.208227	-0.364401
chr6:87992696-88001764	GJB7	-1.91356	0.290399	0.475449
chr6:88032305-88052043	C6orf162	1.36559	2.25033	0.684772
chr6:100956206-101329224	ASCC3	0.230235	-0.0683709	-0.163532
chr6:109735098-109765164	PPIL6	-0.557808	0.250994	0.366159
chr6:111620173-111804414	REV3L	-0.359738	-0.139833	-0.0580503
chr6:112391859-112426921	TUBE1	-0.478852	0.176374	-0.100035
chr6:134273822-134384702	SLC2A12	-0.46742	-0.0533694	0.281918
chr6:158402887-158520213	SYNJ2	14	14	14
chr6:159193542-159240456	EZR	0.353935	-0.249359	-0.23903
chr6:160182981-160210735	TCP1	0.529159	0.0416142	0.0515699
chr7:5566776-5603370	ACTB	-0.437307	0.10789	0.0140551
chr7:5632452-5646286	FSCN1	0.998001	0.804075	1.39817
chr7:8008422-8128709	GLCCI1	-0.366281	-0.00930804	0.218208
chr7:16491407-16505535	SOSTDC1	-0.738887	-0.0921942	-0.604716
chr7:20367978-20455382	ITGB8	-0.37251	0.330786	0.22732
chr7:21467688-21554457	SP4	-0.56511	-0.33741	-0.28199
chr7:23719748-23742269	C7orf46	-0.664383	0.122603	-0.0778896
chr7:26331514-26413951	SNX10	0.342123	0.3273	0.103062
chr7:30174551-30202381	C7orf41	-0.381066	0.400766	0.511878
chr7:32956304-33149018	FKBP9	-0.434213	0.14281	0.275926
chr7:36363742-36493400	ANLN	-0.15758	-0.439468	-0.503007
chr7:43622691-43769118	STK17A	0.317071	0.0836357	0.013696
chr7:48075116-48100894	C7orf57	-1.10647	0.499651	0.228099
chr7:48128354-48148330	UPP1	0.750493	0.162798	0.0118759
chr7:56032674-56067985	GBAS	-0.392608	0.275146	0.0521861
chr7:56077722-56184090	SUMF2	-0.366567	0.178526	0.184961
chr7:75921440-75933676	HSPB1	0.422078	0.0530402	0.408288
chr7:91570188-91741061	AKAP9	-0.280956	-0.290276	-0.36213
chr7:92092298-92157845	PEX1	-2.6518	-0.827681	-0.537169
chr7:93550995-93557767	GNG11	0.846094	0.0536784	-0.319937
chr7:94288367-94299049	PEG10	1.02272	0.00283842	-0.454986
chr7:94536943-94925787	PPP1R9A	-0.237928	-0.450706	-0.56773
chr7:97841564-97881468	BHLHA15	0.945032	1.5578	0.923079
chr7:99613218-99639314	ZKSCAN1	-0.348258	-0.129742	-0.0296696
chr7:106809436-107218968	HBP1	-0.429654	-0.212695	-0.036825
chr7:112062965-112117258	IFRD1	0.284423	-0.0668015	-0.0496687
chr7:138728191-138763897	ZC3HAV1	-1.03724	0.42368	-0.257443
chr7:148036563-148118088	CNTNAP2	0.40755	0.0228144	-0.0914652
chr7:150783121-150841523	AGAP3	0.392642	0.272729	0.686673
chr7:155089485-155102324	INSIG1	-0.237547	-0.225415	-0.47953
chr7:1473958-1544018	INTS1	0.270797	0.0244688	0.264815
chr7:13930855-14026139	ETV1	-0.639626	-0.967066	-0.444881
chr7:26706662-26903193	SKAP2	-0.338476	-0.00239076	-0.237864
chr7:27565058-27676338	HIBADH	-0.439458	0.185767	0.231002
chr7:28992793-29132848	CPVL	-0.446594	-0.251118	-0.281522
chr7:44866335-44887725	H2AFV	-0.28838	-0.154047	-0.411931
chr7:45022626-45026268	C7orf40	0.545162	0.664531	-0.216786
chr7:64433991-64467124	ZNF117	-0.651874	0.327661	0.345369
chr7:87031360-87461626	ABCB1	0.49073	-0.502659	-0.257877
chr7:93492010-93520155	TFPI2	1.97932	0.216669	-0.017342
chr7:94058497-94060543	COL1A2	0.394696	-0.827265	-1.214
chr7:102937872-102985320	DNAJC2	0.351655	0.0258546	0.019458
chr7:107531585-107770801	LAMB1	-0.399823	-0.188008	-0.0025618
chr7:120427370-120498177	TSPAN12	-0.446548	0.169535	0.404907
chr7:123092235-123174718	IQUB	-0.830379	0.667371	0.242833
chr7:128032330-128050036	IMPDH1	0.491948	0.218396	0.327785
chr7:131184965-131241376	PODXL	0.500145	-0.159748	-0.304495
chr7:150909406-150923969	ABCF2	0.278668	-0.0789968	-0.152334
chr8:9413437-9639859	TNKS	-0.244501	-0.263374	-0.240293
chr8:15397595-15615600	TUSC3	-0.229432	0.159489	0.188373
chr8:19171080-19255349	SH2D4A	0.395541	0.0457149	-8.14551e-06
chr8:19674914-19709586	INTS10	0.248344	0.0339064	-0.150191
chr8:25316512-25368870	CDCA2	-0.277195	-0.568727	-0.462374
chr8:26240987-26270732	BNIP3L	-0.391051	-0.0215846	-0.0549354
chr8:27454433-27472328	CLU	1.34119	0.263101	0.89783
chr8:38758752-38831435	PLEKHA2	0.21639	0.418601	0.0429996
chr8:42128819-42190171	IKBKB	0.400153	0.288308	0.413368
chr8:42273992-42409747	C8orf40	-0.598686	0.0878951	-0.154694
chr8:66626568-66754204	PDE7A	-0.414456	0.0791207	0.127385
chr8:81397139-81436449	ZBTB10	-0.314192	-0.0628293	-0.066692
chr8:92082423-92099323	OTUD6B	0.507867	0.405658	0.132668
chr8:94767071-94831460	TMEM67	-0.395909	0.210593	0.140508
chr8:97657498-98120793	PGCP	-0.889041	0.129274	0.357375
chr8:104410740-104455865	DCAF13	0.300569	0.153345	-0.0287827
chr8:120885899-121068993	DEPTOR	0.678663	1.10887	0.283337
chr8:127564682-127601471	FAM84B	0.858647	0.272295	-1.30057
chr8:128748284-128753853	MYC	0.879841	0.812259	0.414144
chr8:17501302-17658642	MTUS1	-0.34415	-0.0229448	0.184082
chr8:17913839-17942507	ASAH1	-0.297434	0.266384	0.116454
chr8:27454433-27472328	CLU	1.17121	0.0713639	0.249296
chr8:38268655-38326352	FGFR1	0.333347	0.213569	0.384609
chr8:52730133-52752040	PCMTD1	-0.429122	0.294298	0.216858
chr8:66626568-66754204	PDE7A	-0.534707	-0.316367	-0.178561
chr8:67955312-67959962	COPS5	0.383102	0.113189	-0.0232524
chr8:91634192-91658332	TMEM64	0.950581	0.705728	1.06812
chr8:92082423-92099323	OTUD6B	-14	-0.938343	-2.32926
chr8:93895757-93978372	C8orf83	-0.30379	0.114184	-0.145812
chr8:95649468-95650459	LOC100288748	-1.34095	-0.300236	-0.306578
chr8:99466860-99837919	STK3	-0.290508	-0.106675	-0.111302
chr8:101926687-101965623	YWHAZ	0.220797	-0.086907	-0.0706912
chr8:104410740-104455865	SLC25A32	0.632404	0.484823	0.0179474
chr8:116420506-116681350	TRPS1	-0.320081	-0.606084	-0.162595
chr8:117858170-117886655	RAD21	-0.217154	-0.193892	-0.356869
chr8:127564682-127601471	FAM84B	-0.254055	-0.908344	-0.302575
chr8:144873089-144897836	SCRIB	0.298234	-0.136969	0.234786
chr8:144954561-145047697	PLEC	0.306318	0.0595141	0.459422
chr9:4985244-5129285	JAK2	0.476713	0.142859	0.0149643
chr9:26903357-27062012	IFT74	-0.502494	0.0437239	-0.0422236
chr9:33025208-33039995	DNAJA1	0.409825	0.164103	0.183758
chr9:35829221-35856387	TMEM8B	-0.663156	-0.0803864	0.08685
chr9:36572876-36681197	MELK	-0.226635	-0.235089	-0.466255
chr9:75764559-75785469	ANXA1	0.817381	0.56385	0.160206
chr9:87283465-87430621	NTRK2	1.07788	-0.435187	0.112971
chr9:95947211-96108696	WNK2	-0.657062	-0.0707535	0.3312
chr9:123519253-123578004	LOC100288842	-0.424696	0.0081126	-0.510296
chr9:123850573-123939886	CNTRL	-0.608927	-0.171527	-0.254454
chr9:124030379-124095124	GSN	0.442076	0.196364	0.160856
chr9:127020195-127177777	NEK6	-0.269127	-0.32394	-0.26429
chr9:127962820-127996438	RABEPK	0.537829	0.464753	0.16433
chr9:131102838-131123749	SLC27A4	0.489241	-0.0813103	0.0547994
chr9:131314836-131419129	SPTAN1	-0.175191	-0.341382	-0.277545
chr9:131549474-131572809	TBC1D13	0.328697	0.0172145	0.170034
chr9:131683173-131704320	PHYHD1	-0.783122	-0.140595	-0.352012
chr9:132815662-132902448	GPR107	-0.172542	-0.0821227	-0.203656
chr9:133320093-133377664	ASS1	0.532214	-0.0860687	-0.187932
chr9:136890560-136933141	NCRNA00094	-0.593155	-0.143666	0.0171934
chr9:137979811-138013030	OLFM1	1.49716	3.28087	2.12246
chr9:139560205-139567130	EGFL7	-0.485487	0.00482076	0.439979
chr9:3218313-3525983	RFX3	-0.515634	0.252195	0.0546468
chr9:5913956-6008003	KIAA2026	-0.323915	-0.225437	-0.115479
chr9:14081814-14322013	NFIB	-0.266316	-0.228935	-0.38041
chr9:34179002-34329230	KIF24	-0.519027	-0.330427	-0.28397
chr9:35681989-35690635	TPM2	0.918174	0.965016	1.69981
chr9:36336395-36424663	RNF38	-0.257483	-0.231965	-0.127484
chr9:37887200-37904350	MCART1	0.504682	0.154206	0.153581
chr9:86449048-86536342	KIF27	-0.540245	0.278189	0.383245
chr9:99262392-99382112	CDC14B	-0.289109	-0.0360441	0.0942721
chr9:100263461-100459691	TSTD2	-0.437589	-0.0519768	-0.0967963
chr9:111777414-111882287	C9orf5	-0.21662	-0.196224	-0.273375
chr9:123151115-123342437	CDK5RAP2	-0.216855	-0.406577	-0.453985
chr9:125606746-125667632	RC3H2	-0.235919	-0.243508	-0.290253
chr9:131580760-131592142	C9orf114	0.566417	0.155178	0.323132
chr9:139296373-139305054	SDCCAG3	0.427406	0.155917	0.155936
chr9:139901685-139923374	ABCA2	-0.455747	0.12935	0.534003
chrX:23801274-23804329	SAT1	0.342944	0.00777149	0.247456
chrX:40440180-40465904	ATP6AP2	-0.216682	0.152168	-0.074453
chrX:40944651-41095832	USP9X	-0.161889	-0.418454	-0.465303
chrX:48432740-48439553	RBM3	-0.355452	-0.0510167	-0.262775
chrX:48660327-48683451	HDAC6	-0.401894	-0.0480654	0.207526
chrX:54834156-54957866	MAGED2	-0.266098	-0.0714481	-0.0557847
chrX:66763873-66950464	AR	0.36749	0.679391	0.644613
chrX:69509878-69640850	KIF4A	-0.332412	-0.700154	-0.718929
chrX:80492725-80554446	SH3BGRL	-0.333969	0.11386	0.0733444
chrX:84498996-84528368	ZNF711	-0.358191	0.237747	0.311675
chrX:101768607-101770116	TMSB15A	-0.557947	0.158042	-0.0577045
chrX:107682972-107940775	COL4A5	-0.646493	-0.0213218	-0.081758
chrX:122993661-123047829	XIAP	-0.209646	0.0498377	-0.140083
chrX:129040086-129063738	UTP14A	0.350137	0.0579042	-0.151702
chrX:134480815-134497338	ZNF449	-0.512897	0.240425	0.202148
chrX:144899346-144907360	SLITRK2	0.958203	-0.0916106	0.690853
chrX:152066679-152142025	ZNF185	-0.341883	0.293407	0.247277
chrX:152954965-152962070	SLC6A8	0.678774	0.463222	0.945304
chrX:153287027-153363188	MECP2	-0.970811	-0.220328	0.967008
chrX:2821945-2882494	ARSD	-0.482236	-0.00766214	-0.27985
chrX:10413349-10851870	MID1	-0.416702	-0.215677	-0.192108
chrX:12993176-12995380	TMSB4X	0.929896	0.551457	0.79536
chrX:13788858-13956831	GPM6B	-0.432422	-0.282881	-0.365629
chrX:15848199-15873100	AP1S2	-0.853256	-0.610249	-0.446041
chrX:38143701-38186788	RPGR	-0.691447	0.0488541	0.0764136
chrX:44007127-44202923	EFHC2	-0.734918	-0.0507736	-0.00493071
chrX:53559062-53713673	HUWE1	-0.189017	-0.565323	-0.49329
chrX:53961475-54070877	PHF8	-0.37733	0.257145	0.277819
chrX:62619710-62780944	LOC92249	0.428138	0.168406	0.661136
chrX:62854845-63005426	ARHGEF9	-0.252771	0.128899	0.0221266
chrX:66763873-66950464	AR	-0.582785	-0.0974612	-0.379377
chrX:74958826-74966878	TTC3P1	-0.262693	-0.0507133	0.0195816
chrX:76760355-77041719	ATRX	-0.240741	-0.0620083	0.000143254
chrX:112018013-112084189	AMOT	-0.26077	-0.108578	0.0635874
chrX:151334741-151619831	GABRA3	-0.506488	0.0579673	0.209824
chrX:153126970-153141399	L1CAM	1.05683	-0.168559	0.935768
chrX:153759521-153793261	G6PD	0.423467	-0.0102225	0.186238
